# Supplementary material for: Impact of CFTR Modulators on Beta-Cell Function in Children and Young Adults with Cystic Fibrosis
Source: MDPI journal article supplement (doi:10.3390/jcm11144149), 2022-07-17
Supplement: s1 [file s1]

**Supplementary Table S1.** Additional metabolic characteristics of the study subjects before starting Lumacaftor/Ivacaftor and after 12-18 months of treatment. Data are expressed as mean (standard deviation) or median (IQR), unless otherwise specified. Abbreviations: *HbA1c* glycated haemoglobin; *PG* plasma glucose; *min* minutes; *PI* plasma insulin; *CP* C-peptide; *IGI* Insulinogenic Index; *DI* Disposition Index; *HOMA-IR* Homeostasis model assessment insulin resistance.

| Variables                  | Baseline                                     | After 12-18 months of Lumacaftor/Ivacaftor     | <i>p</i>     |
|----------------------------|----------------------------------------------|------------------------------------------------|--------------|
| HbA1c (% , mmol/mol)       | 5.8 (5.3 – 6.1),<br>39.5 (37.2 – 42.5)       | 5.6 (5.4 – 5.9),<br>38.0 (36.2 – 40.5)         | 0.59         |
| Fasting PG (mg/dL, mmol/L) | 81.5 [77.5 – 87.8],<br>4.52 [4.29 – 4.86]    | 89.0 [82.5 – 94.8],<br>4.94 [4.57 – 5.25]      | <b>0.032</b> |
| 30 min PG (mg/dL, mmol/L)  | 132.0 [123.0 – 157.8],<br>7.32 [6.82 – 8.75] | 146.0 [132.6 – 154.0],<br>8.10 [7.37 – 8.55]   | 0.71         |
| 60 min PG (mg/dL, mmol/L)  | 159.0 [133.3–187.8],<br>8.82 [7.39 – 10.42]  | 183.0 [156.8 – 207.8],<br>10.15 [8.70 – 11.53] | 0.45         |
| 90 min PG (mg/dL, mmol/L)  | 138.0 [119.0 –196.0],<br>7.66 [6.60 – 10.88] | 149.0 [131.8 – 165.5],<br>8.27 [7.31 – 9.18]   | 0.87         |
| 120 min PG (mg/dL, mmol/L) | 121.0 [105.0 – 157.5],<br>6.71 [5.83 – 8.74] | 125.0 [108.3 – 143.3],<br>6.94 [6.05 – 7.95]   | 0.69         |
| Fasting PI (pmol/L)        | 37.2 [24.3 – 75.2]                           | 49.0 [29.0 – 58.0]                             | 0.87         |
| 30 min PI(pmol/L)          | 132.3 [97.7 – 249.8]                         | 169.5 [140.8 – 266.9]                          | 0.68         |
| 60 min PI (pmol/L)         | 258.0 [193.8 – 393.4]                        | 315.0 [210.8 – 513.4]                          | 0.57         |
| 90 min PI (pmol/L)         | 379.2 [189.0 – 472.4]                        | 391.7 [273.1 – 500.6]                          | 0.50         |
| 120 min PI(pmol/L)         | 263.9 [126.4 – 533.0]                        | 274.3 [224.7 – 412.9]                          | 0.75         |
| Fasting CP (nmol/L)        | 0.37 [0.21 – 0.59]                           | 0.37 [0.31 – 0.50]                             | 0.97         |
| 30 min CP (nmol/L)         | 1.11 [0.54 – 2.08]                           | 1.08 [0.83 – 1.30]                             | 0.82         |
| 60 min CP (nmol/L)         | 1.78[1.12 – 3.01]                            | 2.05 [1.39 – 2.47]                             | 0.97         |
| 90 min CP (nmol/L)         | 2.25 [1.70 – 2.99]                           | 2.29 [1.97 – 2.87]                             | 0.24         |
| 120 min CP (nmol/L)        | 2.18 [1.30 – 3.64]                           | 2.38 [1.80 – 3.02]                             | 0.68         |
| IGI                        | 0.29 [0.21 – 0.42]                           | 0.31 [0.24 – 0.56]                             | 0.75         |
| DI                         | 2.40 [1.78 – 3.16]                           | 1.88 [1.41 – 3.17]                             | 0.60         |
| HOMA-IR                    | 1.07 [0.68 – 2.00]                           | 1.43 [0.98 – 1.99]                             | 0.60         |
| Matsuda Index              | 7.88 [4.20 – 11.02]                          | 5.46 [3.98 – 6.98]                             | 0.25         |

**Supplementary Table S2.** Additional metabolic characteristics of the study subjects before starting Exacaftor/Ivacaftor/Tezacaftor therapy and after 12-18 months of treatment. Data are expressed as mean (standard deviation) or median [IQR], unless otherwise specified. Abbreviations: *HbA1c* glycated haemoglobin; *PG* plasma glucose; *min* minutes; *PI* plasma insulin; *CP* C-peptide; *IGI* Insulinogenic Index; *DI* Disposition Index; *HOMA-IR* Homeostasis model assessment insulin resistance.

| Variables                  | Baseline                                   | After 12-18 months of<br>Exacaftor/Ivacaftor/Tezacaftor | P           |
|----------------------------|--------------------------------------------|---------------------------------------------------------|-------------|
| HbA1c (% , mmol/mol)       | 5.8 [5.2-6.6],<br>40.0 [33.0-48.5]         | 5.4 [4.8 – 5.8],<br>36.0 [29.5-40.0]                    | <b>0.04</b> |
| Fasting PG (mg/dL, mmol/L) | 84.0 [71.50 – 104.0],<br>4.66 [3.97-5.77]  | 90.0 [86.5-103],<br>4.99 [4.80-5.72]                    | 0.50        |
| 30 min PG (mg/dL, mmol/L)  | 161.0 [130.0-217.5],<br>8.94 [7.22-12.07]  | 180.00 [146.0-209.0],<br>9.99 [8.10-11.60]              | 0.59        |
| 60 min PG (mg/dL, mmol/L)  | 221.0 [129.0-261.5],<br>12.27 [7.16-14.52] | 183.0 [149.5-246.0],<br>10.16 [8.30-13.66]              | 0.69        |
| 90 min PG (mg/dL, mmol/L)  | 181.0 [104.0-238.5],<br>10.05 [5.77-13.24] | 189.0 [130.0-227.5],<br>10.49 [7.22-16.62]              | 0.69        |
| 120 min PG (mg/dL, mmol/L) | 133.00 [103.0-202.0],<br>7.38 [5.72-11.21] | 142.00 [111.0-182.5],<br>7.88 [6.16-10.13]              | 0.89        |
| Fasting PI (pmol/L)        | 34.73 [16.67-75.35]                        | 46.53 [24.31-75.35]                                     | 0.69        |
| 30 min PI (pmol/L)         | 214.6 [111.5-339.6]                        | 275.0 [174.3-284.4]                                     | 0.69        |
| 60 min PI (pmol/L)         | 323.6 [171.5-704.6]                        | 323.6 [214.6-677.1]                                     | 1.00        |
| 90 min PI (pmol/L)         | 316.7 [181.3-509.8]                        | 397.3 [284.8-771.2]                                     | 0.23        |
| 120 min PI (pmol/L)        | 310.4 [236.1-443.1]                        | 425.7 [238.2-594.8]                                     | 0.14        |
| Fasting CP (nmol/L)        | 0.34 [0.30-0.54]                           | 0.49 [0.42-0.55]                                        | 0.35        |
| 30 min CP (nmol/L)         | 1.12 [0.65-1.50]                           | 1.26 [0.86-1.81]                                        | 0.08        |
| 60 min CP (nmol/L)         | 2.00 [1.07-3.26]                           | 2.30 [1.46-2.89]                                        | 0.69        |
| 90 min CP (nmol/L)         | 1.67 [1.56-3.19]                           | 2.42 [1.76-3.85]                                        | 0.23        |
| 120 min CP (nmol/L)        | 1.92 [1.67-3.13]                           | 2.85 [2.06-3.12]                                        | 0.5         |
| IGI                        | 0.25 [0.13-0.62]                           | 0.33 [0.31-0.34]                                        | 0.15        |
| DI                         | 1.22 [0.36-4.48]                           | 2.64 [1.05-4.49]                                        | 0.72        |
| HOMA-IR                    | 2.10 [0.45-5.40]                           | 1.40 [0.75-2.70]                                        | 0.50        |
| Matsuda Index              | 4.88 [3.54-7.95]                           | 8.14 [3.15-14.51]                                       | 0.47        |
